# Supplementary material for: Perceived Feasibility of Group EMDR Therapy Among Disaster-Affected Adolescents in Turkey: A Convergent Mixed-Methods Study
Source: Research Square preprint supplement (doi:10.21203/rs.3.rs-7185934/v1), 2025-08-26
Supplement: Supplementary file 1 [file fcab50104f07ff2bd5c3e9f6.xlsx]

## Sheet: Sheet1
ID	Age	Gender	Disaster_Type	Time_Since_Disaster_Months	EMDR_Awareness (Y/N)	Feasibility_Avg_Score_1to5	PTSD_Total_CPSS_0to80	Resilience_Score_CDRISC_0to40	OpenQ1_EmotionalSupport	OpenQ2_PerceptionOfGroupTherapy	OpenQ3_RecoverySuggestions
1	16	Male	Earthquake	2	No	4.47	3	25	Support from family	Likes creative methods	More awareness programs
2	17	Female	Flood	1	No	4.49	39	30	Art and drawing	Group therapy sounds interesting	Safe spaces in schools
3	15	Female	Earthquake	7	No	3.66	64	27	Talking to friends	Uncomfortable sharing	Creative outlets
4	17	Female	Earthquake	7	No	3.36	52	36	Art and drawing	Likes creative methods	Creative outlets
5	17	Female	Flood	8	Yes	3.86	67	27	Talking to friends	Likes creative methods	Peer support groups
6	14	Male	Flood	5	Yes	3.43	52	30	Support from family	Likes creative methods	More awareness programs
7	15	Female	Earthquake	3	No	4.48	28	34	School counselor	Feels safe in group therapy	Safe spaces in schools
8	15	Female	Flood	12	No	3.83	25	34	Art and drawing	Feels safe in group therapy	Creative outlets
9	15	Female	Flood	8	Yes	3.99	33	2	School counselor	Open to trying EMDR	Access to professionals
10	17	Female	Flood	6	Yes	4.47	51	19	Talking to friends	Uncomfortable sharing	Safe spaces in schools
11	16	Male	Flood	11	Yes	4.32	49	12	Art and drawing	Likes creative methods	Peer support groups
12	15	Female	Earthquake	3	Yes	4.44	41	16	School counselor	Uncomfortable sharing	More awareness programs
13	18	Female	Earthquake	1	No	4.24	25	25	School counselor	Open to trying EMDR	Access to professionals
14	17	Male	Flood	3	Yes	2.85	42	33	Art and drawing	Group therapy sounds interesting	Safe spaces in schools
15	14	Male	Flood	5	No	4.22	1	21	School counselor	Open to trying EMDR	Safe spaces in schools
16	16	Female	Earthquake	3	No	2.57	42	33	Art and drawing	Likes creative methods	Creative outlets
17	18	Female	Flood	1	No	3.83	10	40	School counselor	Group therapy sounds interesting	Safe spaces in schools
18	18	Female	Flood	5	Yes	3.87	1	21	Support from family	Group therapy sounds interesting	More awareness programs
19	14	Male	Earthquake	10	No	4.38	41	30	Art and drawing	Open to trying EMDR	More awareness programs
20	16	Female	Earthquake	7	Yes	3.71	4	28	Support from family	Likes creative methods	Safe spaces in schools
21	17	Male	Flood	7	Yes	3.14	6	6	Listening to music	Group therapy sounds interesting	Creative outlets
22	13	Female	Earthquake	11	No	3.73	9	27	Support from family	Open to trying EMDR	Access to professionals
23	16	Female	Flood	9	No	4.42	35	11	School counselor	Open to trying EMDR	Access to professionals
24	14	Female	Earthquake	10	Yes	4.14	36	25	Talking to friends	Likes creative methods	Creative outlets
25	18	Male	Flood	10	Yes	4.38	37	8	Support from family	Open to trying EMDR	Peer support groups
26	17	Male	Earthquake	12	Yes	3.36	57	22	Support from family	Open to trying EMDR	More awareness programs
27	16	Female	Earthquake	3	Yes	3.76	4	25	Support from family	Open to trying EMDR	Peer support groups
28	13	Female	Earthquake	7	No	2.55	52	24	Talking to friends	Uncomfortable sharing	Creative outlets
29	13	Male	Flood	1	Yes	3.46	32	6	Talking to friends	Feels safe in group therapy	Peer support groups
30	15	Female	Flood	4	No	3.66	51	2	Support from family	Uncomfortable sharing	Creative outlets
31	15	Male	Flood	4	No	3.64	35	21	Listening to music	Open to trying EMDR	Access to professionals
32	14	Male	Earthquake	5	Yes	4.42	38	18	Talking to friends	Feels safe in group therapy	Access to professionals
33	16	Male	Earthquake	7	Yes	3.45	41	38	Talking to friends	Group therapy sounds interesting	Peer support groups
34	16	Male	Flood	7	Yes	3.71	36	36	Talking to friends	Uncomfortable sharing	Peer support groups
35	18	Female	Flood	11	Yes	3.96	22	22	Art and drawing	Uncomfortable sharing	More awareness programs
36	18	Male	Earthquake	4	No	3.86	50	25	Support from family	Uncomfortable sharing	Access to professionals
37	18	Female	Flood	7	Yes	3.68	32	16	Listening to music	Likes creative methods	More awareness programs
38	15	Male	Flood	11	Yes	3.86	25	29	Talking to friends	Open to trying EMDR	Peer support groups
39	16	Female	Earthquake	3	Yes	3.86	36	29	Art and drawing	Group therapy sounds interesting	Creative outlets
40	16	Male	Flood	6	Yes	3.69	21	25	School counselor	Group therapy sounds interesting	Access to professionals
41	13	Male	Flood	12	Yes	3.88	24	15	School counselor	Group therapy sounds interesting	Creative outlets
42	15	Male	Earthquake	2	Yes	3.45	0	39	Talking to friends	Open to trying EMDR	More awareness programs
43	17	Female	Earthquake	10	Yes	3.2	45	19	Listening to music	Feels safe in group therapy	More awareness programs
44	15	Male	Earthquake	9	No	2.77	35	35	Listening to music	Uncomfortable sharing	Safe spaces in schools
45	17	Female	Earthquake	5	No	3.61	25	29	Support from family	Open to trying EMDR	Access to professionals
46	13	Female	Earthquake	6	No	4.38	7	27	Talking to friends	Uncomfortable sharing	Access to professionals
47	14	Male	Flood	12	No	4.5	25	8	School counselor	Open to trying EMDR	More awareness programs
48	16	Male	Flood	12	No	2.92	42	3	Support from family	Uncomfortable sharing	Creative outlets
49	13	Female	Flood	12	No	2.52	5	36	Listening to music	Open to trying EMDR	Access to professionals
50	16	Female	Flood	12	Yes	4.17	78	30	Support from family	Feels safe in group therapy	More awareness programs
51	18	Male	Earthquake	4	No	3.88	24	35	School counselor	Group therapy sounds interesting	Safe spaces in schools
52	14	Male	Earthquake	11	No	4.4	27	30	Listening to music	Uncomfortable sharing	Peer support groups
53	14	Male	Flood	10	Yes	3.64	33	31	Art and drawing	Open to trying EMDR	Access to professionals
54	13	Female	Flood	7	Yes	4.23	36	16	Art and drawing	Feels safe in group therapy	Peer support groups
55	14	Male	Earthquake	12	No	3.2	40	26	Talking to friends	Feels safe in group therapy	Creative outlets
56	17	Male	Earthquake	9	Yes	4.33	44	4	Support from family	Group therapy sounds interesting	Safe spaces in schools
57	14	Female	Flood	7	Yes	2.51	12	17	Listening to music	Open to trying EMDR	Access to professionals
58	16	Male	Earthquake	1	No	4.16	40	23	Talking to friends	Uncomfortable sharing	Peer support groups
59	16	Male	Earthquake	1	No	4.3	5	31	Support from family	Likes creative methods	Peer support groups
60	16	Female	Flood	9	Yes	4.35	37	24	School counselor	Feels safe in group therapy	More awareness programs
61	16	Female	Earthquake	11	No	3.82	21	3	Listening to music	Feels safe in group therapy	Peer support groups
62	17	Female	Earthquake	9	Yes	3.47	40	35	Support from family	Group therapy sounds interesting	Creative outlets
63	15	Male	Earthquake	4	No	2.82	71	39	Listening to music	Open to trying EMDR	Peer support groups
64	18	Male	Earthquake	9	No	2.66	48	24	Support from family	Likes creative methods	Creative outlets
65	13	Male	Flood	3	No	3.39	58	11	School counselor	Likes creative methods	Creative outlets
66	16	Male	Earthquake	7	No	3.69	59	30	Listening to music	Likes creative methods	More awareness programs
67	14	Female	Flood	6	Yes	2.76	23	26	Art and drawing	Open to trying EMDR	Safe spaces in schools
68	16	Male	Earthquake	8	No	2.59	65	23	School counselor	Uncomfortable sharing	Creative outlets
69	14	Male	Flood	11	No	3.35	50	30	Support from family	Feels safe in group therapy	Peer support groups
70	18	Male	Flood	9	No	3.75	25	31	Listening to music	Open to trying EMDR	Peer support groups
71	18	Male	Flood	5	Yes	4.45	14	29	School counselor	Likes creative methods	Creative outlets
72	18	Male	Flood	1	Yes	4.47	60	36	Support from family	Feels safe in group therapy	Peer support groups
73	14	Male	Earthquake	3	Yes	3.89	19	25	Art and drawing	Feels safe in group therapy	Access to professionals
74	16	Male	Flood	10	Yes	3.84	25	35	Art and drawing	Likes creative methods	More awareness programs
75	18	Male	Earthquake	12	No	3.32	50	29	Support from family	Likes creative methods	Peer support groups
76	17	Female	Flood	8	No	4.3	45	16	Art and drawing	Feels safe in group therapy	More awareness programs
77	14	Female	Earthquake	11	No	3.24	39	27	School counselor	Group therapy sounds interesting	Creative outlets
78	14	Female	Earthquake	6	No	2.67	41	26	Art and drawing	Feels safe in group therapy	Creative outlets
79	16	Female	Flood	8	No	4.49	53	35	Talking to friends	Uncomfortable sharing	Creative outlets
80	14	Male	Earthquake	9	Yes	4.22	56	25	Art and drawing	Uncomfortable sharing	More awareness programs
81	14	Female	Flood	4	No	2.59	43	23	Talking to friends	Group therapy sounds interesting	Peer support groups
82	18	Male	Earthquake	1	No	4.31	28	26	Listening to music	Open to trying EMDR	Access to professionals
83	16	Female	Earthquake	1	Yes	2.97	54	27	School counselor	Feels safe in group therapy	More awareness programs
84	18	Male	Earthquake	10	Yes	2.82	34	24	Listening to music	Uncomfortable sharing	Access to professionals
85	18	Male	Flood	4	No	4.44	56	31	Listening to music	Feels safe in group therapy	Peer support groups
86	16	Female	Earthquake	12	Yes	3.8	11	23	Art and drawing	Group therapy sounds interesting	Peer support groups
87	13	Female	Earthquake	7	No	4.42	16	23	Art and drawing	Likes creative methods	More awareness programs
88	18	Male	Flood	2	No	4.45	43	39	Art and drawing	Group therapy sounds interesting	Safe spaces in schools
89	17	Female	Earthquake	3	No	3.96	53	15	Listening to music	Group therapy sounds interesting	Access to professionals
90	17	Male	Flood	1	No	4.11	23	33	School counselor	Group therapy sounds interesting	Creative outlets
91	14	Female	Earthquake	5	No	3.67	29	16	School counselor	Uncomfortable sharing	Access to professionals
92	17	Female	Flood	1	Yes	4.36	11	33	Talking to friends	Group therapy sounds interesting	Peer support groups
93	14	Female	Flood	8	Yes	4.25	59	24	Support from family	Likes creative methods	Peer support groups
94	13	Female	Flood	1	No	3.92	70	16	School counselor	Likes creative methods	More awareness programs
95	16	Male	Flood	11	Yes	3.9	22	30	Art and drawing	Likes creative methods	Safe spaces in schools
96	16	Female	Flood	1	No	3.15	59	26	Talking to friends	Open to trying EMDR	Creative outlets
97	16	Female	Earthquake	2	No	3.46	73	32	Art and drawing	Group therapy sounds interesting	Access to professionals
98	17	Female	Flood	2	No	3.6	30	11	Listening to music	Likes creative methods	Safe spaces in schools
99	13	Female	Earthquake	12	No	3.46	58	13	Listening to music	Open to trying EMDR	Creative outlets
100	17	Male	Flood	6	Yes	2.8	64	30	Art and drawing	Group therapy sounds interesting	Peer support groups
101	17	Male	Earthquake	7	No	3.6	43	36	School counselor	Group therapy sounds interesting	Peer support groups
102	13	Female	Flood	5	No	4.46	52	8	Support from family	Feels safe in group therapy	More awareness programs
103	13	Female	Earthquake	1	No	3.24	14	31	Art and drawing	Group therapy sounds interesting	More awareness programs
104	13	Male	Earthquake	1	No	3.7	21	39	School counselor	Feels safe in group therapy	Access to professionals
105	13	Male	Earthquake	3	Yes	3.31	21	2	Talking to friends	Uncomfortable sharing	Safe spaces in schools
106	16	Female	Flood	2	No	3.85	34	24	Art and drawing	Uncomfortable sharing	Safe spaces in schools
107	15	Male	Earthquake	5	No	4.47	40	23	Talking to friends	Open to trying EMDR	Creative outlets
108	15	Female	Flood	12	No	2.61	41	12	School counselor	Feels safe in group therapy	Access to professionals
109	13	Female	Flood	10	Yes	3.8	18	30	School counselor	Uncomfortable sharing	More awareness programs
110	15	Female	Earthquake	6	Yes	3.98	69	22	School counselor	Uncomfortable sharing	Access to professionals
111	15	Male	Flood	7	No	4.42	39	22	School counselor	Uncomfortable sharing	Peer support groups
112	13	Female	Earthquake	4	No	2.82	64	23	Listening to music	Group therapy sounds interesting	More awareness programs
113	15	Male	Earthquake	7	No	2.84	59	28	School counselor	Feels safe in group therapy	Safe spaces in schools
114	17	Male	Flood	11	No	4.38	48	37	Listening to music	Uncomfortable sharing	More awareness programs
115	14	Male	Earthquake	8	Yes	3.63	36	18	Support from family	Feels safe in group therapy	Peer support groups
116	14	Male	Flood	11	No	3.94	27	27	Listening to music	Likes creative methods	More awareness programs
117	13	Female	Earthquake	1	No	3.41	32	27	Talking to friends	Likes creative methods	Safe spaces in schools
118	16	Male	Flood	6	No	4.25	57	39	Support from family	Group therapy sounds interesting	Peer support groups
119	13	Male	Flood	8	No	4.27	36	30	Talking to friends	Likes creative methods	Creative outlets
120	16	Female	Earthquake	5	No	2.69	30	28	Art and drawing	Open to trying EMDR	Access to professionals
